# Supplementary material for: Effects of UV/H2O2 Degradation on the Physicochemical and Antibacterial Properties of Fucoidan
Source: MDPI journal article supplement (doi:10.3390/md22050209), 2024-05-03
Supplement: s1 [file s1]

(A)

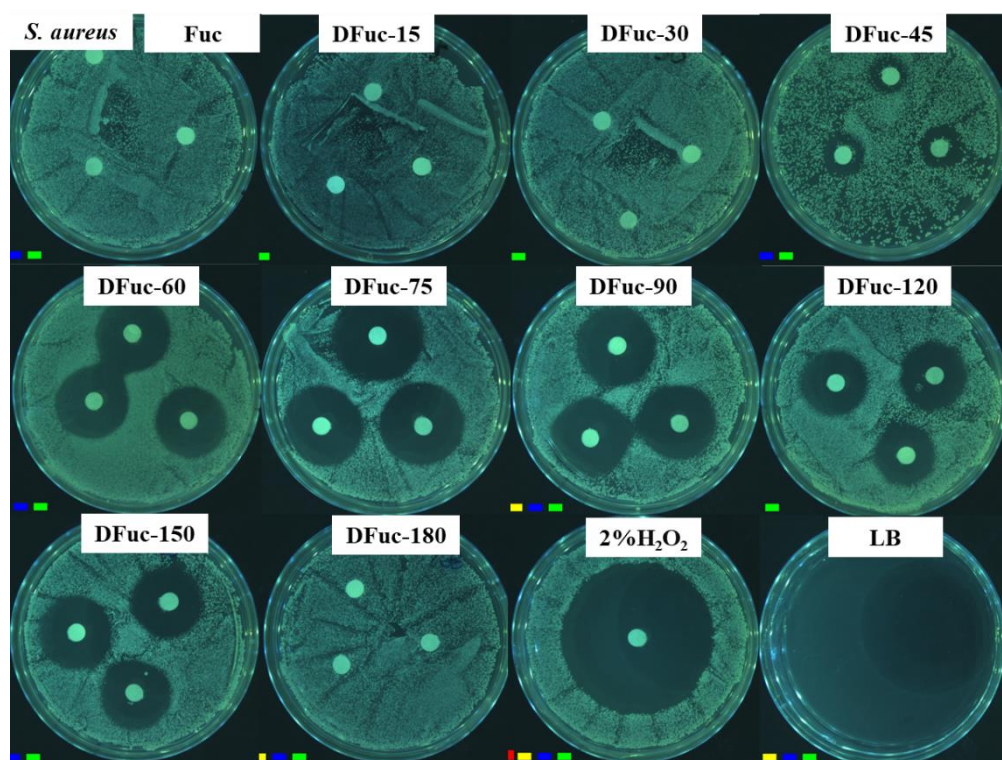

(B)

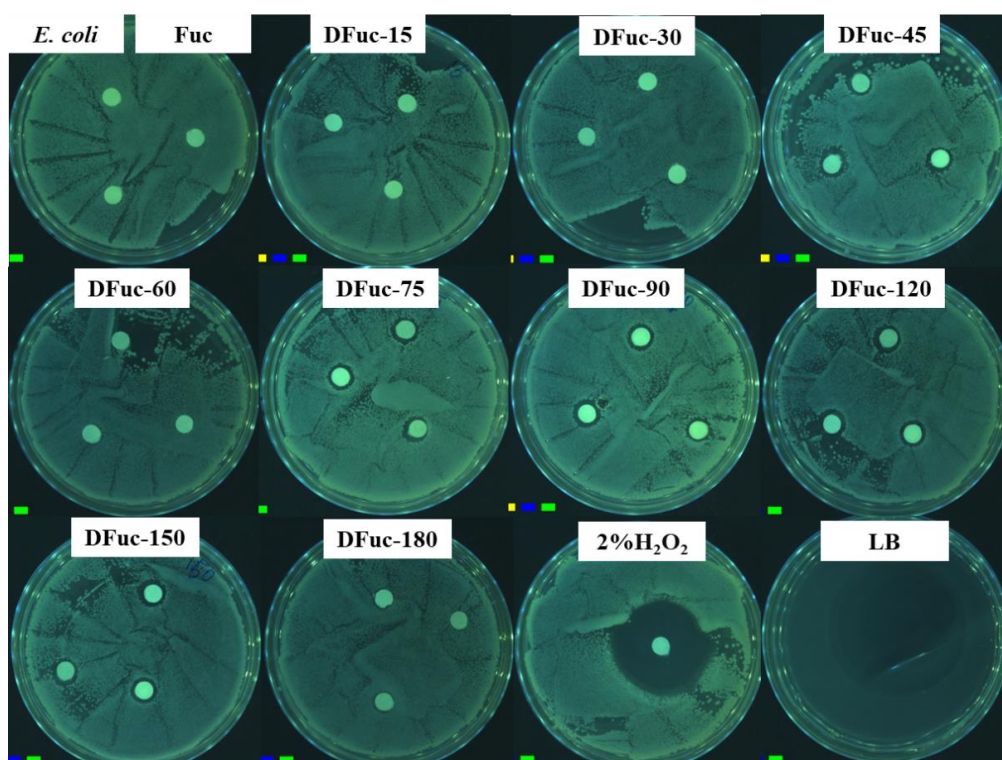

**Figure S1.** The diameters of the antibacterial zones of DFuc-90 (20 mg/mL) against *S. aureus* and *E. coli*. (A) *S. aureus*; (B) *E. coli*.
